# Supplementary material for: The increase of photosynthetic carbon assimilation as a mechanism of adaptation to low temperature in Lotus japonicus
Source: PubMed Central journal article supplement (PMC6351645; doi:10.1038/s41598-018-37165-7), 2019-01-29
Supplement: 41598_2018_37165_MOESM1_ESM.pdf [file 41598_2018_37165_MOESM1_ESM.pdf]

**The increase of photosynthetic carbon assimilation as a mechanism of adaptation to low temperature in *Lotus japonicus***

Calzadilla, Pablo Ignacio; Vilas, Juan Manuel; Escaray, Francisco José; Unrein, Fernando; Carrasco, Pedro; Ruiz, Oscar Adolfo.

**Supplementary Table 1: Functional assignation of the differentially abundant proteins with significant interaction between ecotypes and temperature treatments.** The classification and functional assignation of the significant abundant proteins ( $p < 0.05$ ) was done using KEGG, LegumeIP and Uniprot databases. Values are the mean  $\pm$  SD of three biological replicates, and are expressed as arbitrary units (AUs) relative to the MG-1 control treatment. 1C, MG-1 Control; 1L, MG-1 Low temperature; 20C, MG-20 Control; 20L, MG-20 Low temperature.

| <b>Id Lj</b>    | <b>Uniprot</b>         | <b># KO</b> | <b>KEGG Annotation</b>                                                        | <b>Expression pattern</b>                                                             |
|-----------------|------------------------|-------------|-------------------------------------------------------------------------------|---------------------------------------------------------------------------------------|
| Lj3g3v3032110.2 | >sp P11894 RK9_PEA     | K02939      | large subunit ribosomal protein L9                                            | 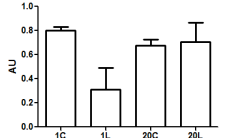   |
| Lj6g3v0925890.1 | >sp B6U151 GATA_MAIZE  | K02433      | aspartyl-tRNA(Asn)/glutamyl-tRNA(Gln) amidotransferase subunit A [EC:6.3.5.6] |    |
| Lj1g3v4154900.1 | >sp Q69RJ0 GLTB_ORYS   | K00284      | glutamate synthase (ferredoxin) [EC:1.4.7.1]                                  |   |
| Lj2g3v1002750.2 | >sp P17067 CAHC_PEA    | K01673      | carbonic anhydrase [EC:4.2.1.1]                                               |  |
| Lj0g3v0100069.1 | >sp P46285 S17P_WHEAT  | K01100      | sedoheptulose-bisphosphatase [EC:3.1.3.37]                                    |  |
| Lj5g3v2045360.1 | >sp P93735 ELIP1_ARATH | -----       | Chlorophyll a-b binding                                                       |  |
| Lj0g3v0050739.1 | >sp Q9BBU3 PSBA_LOTJA  | K02703      | photosystem II P680 reaction center D1 protein [EC:1.10.3.9]                  |  |
| Lj0g3v0160239.1 | >sp Q9BBQ5 PETD_LOTJA  | K02637      | cytochrome b6-f complex subunit 4                                             |  |

| Lj0g3v0341139.1 | sp P31853 ATPX_SPIOL       | K02109 | F-type H <sup>+</sup> -transporting ATPase subunit b [EC:3.6.3.14] | <table border="1"> <thead> <tr> <th>Condition</th> <th>AU</th> </tr> </thead> <tbody> <tr> <td>1C</td> <td>1.0</td> </tr> <tr> <td>1L</td> <td>0.1</td> </tr> <tr> <td>20C</td> <td>0.1</td> </tr> <tr> <td>20L</td> <td>0.1</td> </tr> </tbody> </table> | Condition | AU | 1C | 1.0 | 1L | 0.1 | 20C | 0.1 | 20L | 0.1 |
|-----------------|----------------------------|--------|--------------------------------------------------------------------|-----------------------------------------------------------------------------------------------------------------------------------------------------------------------------------------------------------------------------------------------------------|-----------|----|----|-----|----|-----|-----|-----|-----|-----|
| Condition       | AU                         |        |                                                                    |                                                                                                                                                                                                                                                           |           |    |    |     |    |     |     |     |     |     |
| 1C              | 1.0                        |        |                                                                    |                                                                                                                                                                                                                                                           |           |    |    |     |    |     |     |     |     |     |
| 1L              | 0.1                        |        |                                                                    |                                                                                                                                                                                                                                                           |           |    |    |     |    |     |     |     |     |     |
| 20C             | 0.1                        |        |                                                                    |                                                                                                                                                                                                                                                           |           |    |    |     |    |     |     |     |     |     |
| 20L             | 0.1                        |        |                                                                    |                                                                                                                                                                                                                                                           |           |    |    |     |    |     |     |     |     |     |
| Lj2g3v0609720.1 | >sp Q6DQL1 SUCA2_SOL<br>LC | K01899 | succinyl-CoA synthetase alpha subunit [EC:6.2.1.4<br>6.2.1.5]      | <table border="1"> <thead> <tr> <th>Condition</th> <th>AU</th> </tr> </thead> <tbody> <tr> <td>1C</td> <td>1.0</td> </tr> <tr> <td>1L</td> <td>0.5</td> </tr> <tr> <td>20C</td> <td>1.5</td> </tr> <tr> <td>20L</td> <td>4.0</td> </tr> </tbody> </table> | Condition | AU | 1C | 1.0 | 1L | 0.5 | 20C | 1.5 | 20L | 4.0 |
| Condition       | AU                         |        |                                                                    |                                                                                                                                                                                                                                                           |           |    |    |     |    |     |     |     |     |     |
| 1C              | 1.0                        |        |                                                                    |                                                                                                                                                                                                                                                           |           |    |    |     |    |     |     |     |     |     |
| 1L              | 0.5                        |        |                                                                    |                                                                                                                                                                                                                                                           |           |    |    |     |    |     |     |     |     |     |
| 20C             | 1.5                        |        |                                                                    |                                                                                                                                                                                                                                                           |           |    |    |     |    |     |     |     |     |     |
| 20L             | 4.0                        |        |                                                                    |                                                                                                                                                                                                                                                           |           |    |    |     |    |     |     |     |     |     |
| Lj2g3v0609720.1 | >sp Q6ZL94 SUCA_ORYS<br>J  | K01899 | succinyl-CoA synthetase alpha subunit [EC:6.2.1.4<br>6.2.1.5]      | <table border="1"> <thead> <tr> <th>Condition</th> <th>AU</th> </tr> </thead> <tbody> <tr> <td>1C</td> <td>1.0</td> </tr> <tr> <td>1L</td> <td>0.8</td> </tr> <tr> <td>20C</td> <td>1.0</td> </tr> <tr> <td>20L</td> <td>2.5</td> </tr> </tbody> </table> | Condition | AU | 1C | 1.0 | 1L | 0.8 | 20C | 1.0 | 20L | 2.5 |
| Condition       | AU                         |        |                                                                    |                                                                                                                                                                                                                                                           |           |    |    |     |    |     |     |     |     |     |
| 1C              | 1.0                        |        |                                                                    |                                                                                                                                                                                                                                                           |           |    |    |     |    |     |     |     |     |     |
| 1L              | 0.8                        |        |                                                                    |                                                                                                                                                                                                                                                           |           |    |    |     |    |     |     |     |     |     |
| 20C             | 1.0                        |        |                                                                    |                                                                                                                                                                                                                                                           |           |    |    |     |    |     |     |     |     |     |
| 20L             | 2.5                        |        |                                                                    |                                                                                                                                                                                                                                                           |           |    |    |     |    |     |     |     |     |     |
| Lj6g3v2133230.1 | >sp Q38732 DAG_ANTM<br>A   | K06236 | collagen, type I/II/III/V/XI/XXIV/XXVII,<br>alpha                  | <table border="1"> <thead> <tr> <th>Condition</th> <th>AU</th> </tr> </thead> <tbody> <tr> <td>1C</td> <td>1.0</td> </tr> <tr> <td>1L</td> <td>0.8</td> </tr> <tr> <td>20C</td> <td>0.6</td> </tr> <tr> <td>20L</td> <td>2.2</td> </tr> </tbody> </table> | Condition | AU | 1C | 1.0 | 1L | 0.8 | 20C | 0.6 | 20L | 2.2 |
| Condition       | AU                         |        |                                                                    |                                                                                                                                                                                                                                                           |           |    |    |     |    |     |     |     |     |     |
| 1C              | 1.0                        |        |                                                                    |                                                                                                                                                                                                                                                           |           |    |    |     |    |     |     |     |     |     |
| 1L              | 0.8                        |        |                                                                    |                                                                                                                                                                                                                                                           |           |    |    |     |    |     |     |     |     |     |
| 20C             | 0.6                        |        |                                                                    |                                                                                                                                                                                                                                                           |           |    |    |     |    |     |     |     |     |     |
| 20L             | 2.2                        |        |                                                                    |                                                                                                                                                                                                                                                           |           |    |    |     |    |     |     |     |     |     |

**A**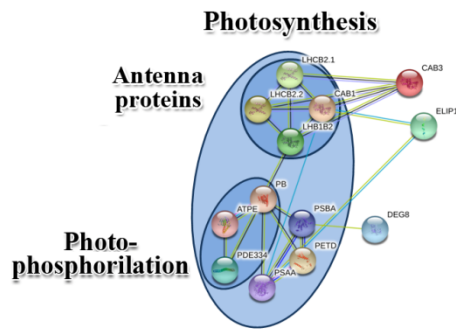**B**

**Starch and saccharose metabolism**

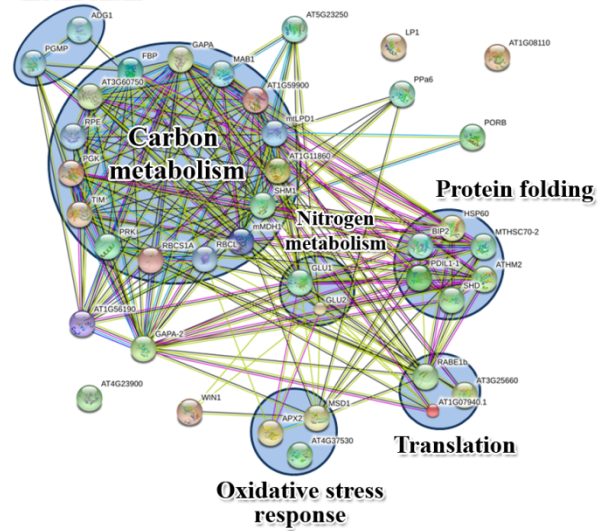

*Supplementary Figure 1: Functional association networks of differentially abundant proteins between MG-1 and MG-20 chloroplasts. A. Higher abundant proteins in MG-1 compared to MG-20. B. Higher abundant proteins in MG-20 compared to MG-1. Data from gene co-occurrence (blue lines), co-expression (black lines), curated databases (light blue lines), experimentally determined (violet lines) and textmining (yellow lines) were used as the prediction methods in the STRING software. The confidence value used for the analysis was  $Score = 0.4$ .*

**A**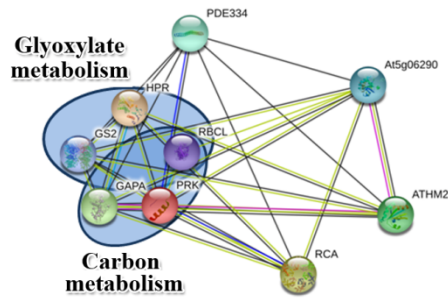**B**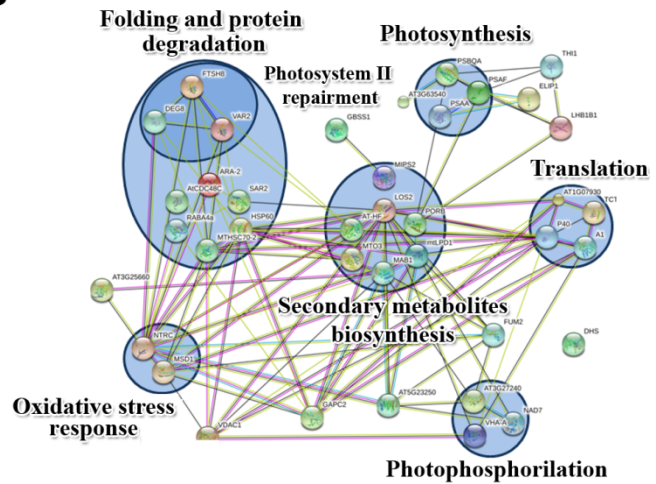

**Supplementary Figure 2: Functional association networks of differentially abundant proteins between temperature treatments.** **A.** Higher abundant proteins in control compared to low temperature treatment. **B.** Higher abundant proteins in the low temperature treatment compared to control. Data from gene co-occurrence (blue lines), co-expression (black lines), curated databases (light blue lines), experimentally determined (violet lines) and textmining (yellow lines) were used as the prediction methods in the STRING software. The confidence value used for the analysis was  $Score = 0.4$ .

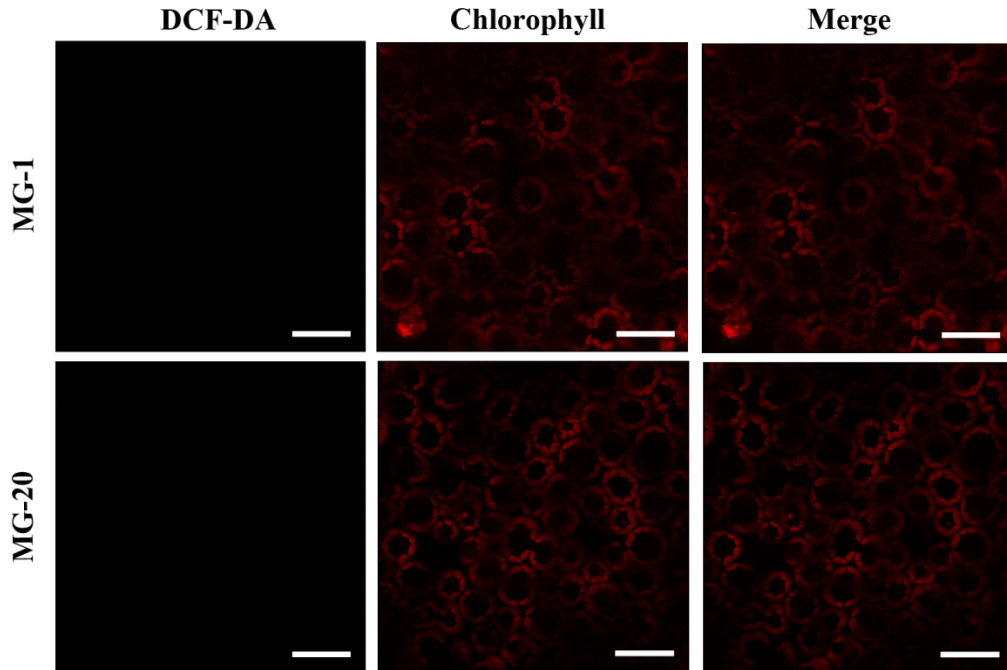

*Supplementary Figure 3: Absence of green fluorescence in leaves of *L. japonicus* not incubated with DFC-DA. Representative images of laser confocal microscopy. Scale bars = 30  $\mu\text{m}$ .*

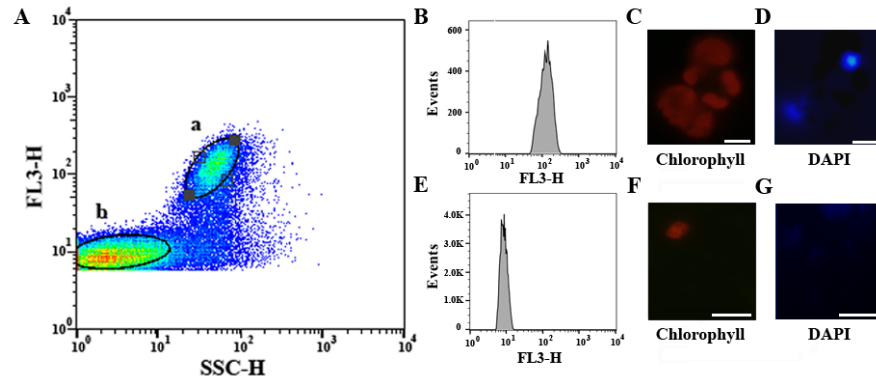

**Supplementary Figure 4: Characterization of cells population extracted from *L. japonicus* leaves.** **A.** SSC vs FL3 cytogram of isolated cells obtained from *L. japonicus* leaves. *a.* Intact cells population. *b.* isolated chloroplasts population and cellular debris. **B.** and **E.** Representative histograms of FL3 fluorescence intensity of *a* and *b* population, respectively. **C-D** and **F-G.** Epifluorescence microscope images of *a* and *b* populations, respectively. **C, F;** Images showing chlorophyll autofluorescence. **D, G;** Images showing the presence of nucleus, after DAPI incubation. Scale bars = 10  $\mu\text{m}$ .

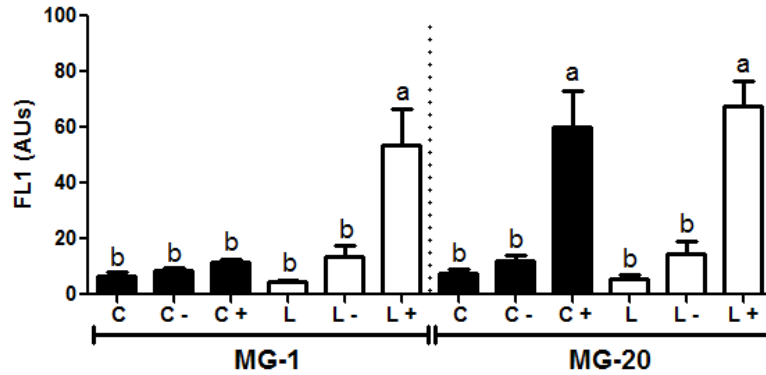

**Supplementary Figure 5: ROS production quantification by flow cytometry in *L. japonicus* isolated cells.** Values are the mean  $\pm$  SD of 5 biological replicates and are expressed as arbitrary units (AUs), for each ecotype and treatment. C, Control; C-, Control cells incubated with DCF-DA but without light; C+, Control cells incubated with DCF-DA and light; L, Low temperature; L-, Low temperature cells incubated with DCF-DA but without light; L+, Low temperature cells incubated with DCF-DA and light. Different letters indicate significant differences between treatments (Tukey test,  $p < 0.05$ ).
